# Supplementary material for: Endothelial MT1‐MMP targeting limits intussusceptive angiogenesis and colitis via TSP1/nitric oxide axis
Source: PubMed Central journal article supplement (PMC7005619; doi:10.15252/emmm.201910862), 2019-12-03
Supplement: EMMM-12-e10862-s001.pdf [file EMMM-12-e10862-s001.pdf]

# Appendix

## **Endothelial MT1-MMP targeting limits intussusceptive angiogenesis and colitis via TSP1-nitric oxide axis**

Sergio Esteban, Cristina Clemente, Agnieszka Koziol, Pilar Gonzalo, Cristina Rius, Fernando Martínez, Pablo M. Linares, María Chaparro, Ana Urzainqui, Vicente Andrés, Motoharu Seiki, Javier P. Gisbert, and Alicia G. Arroyo

### **Appendix table of contents**

**Appendix Figure S1.** MT1-MMP is expressed in endothelial cells of the mucosal plexus in the inflamed colon.

**Appendix Figure S2.** MT1-MMP deletion in endothelial cells reduces vascular leakage but does not influence myeloid cell infiltrate during early colitis.

**Appendix Figure S3.** Mouse aortic endothelial cells from MT1<sup>ΔEC</sup> mice produce lower amounts of nitric oxide.

**Appendix Figure S4.** Effects of MT1-MMP inhibition and of TSP1 on nitric oxide production by human endothelial cells.

**Table S1.** List of potential cleavage sites for MT1-MMP (MMP14) in thrombospondin-1 (TSP1).

**Table S2.** List of qPCR primers used for mouse (m) and human (h) genes in this study.

**Table S3.** List of exact p-values for graphs in Main Figures and Expanded View Figures.

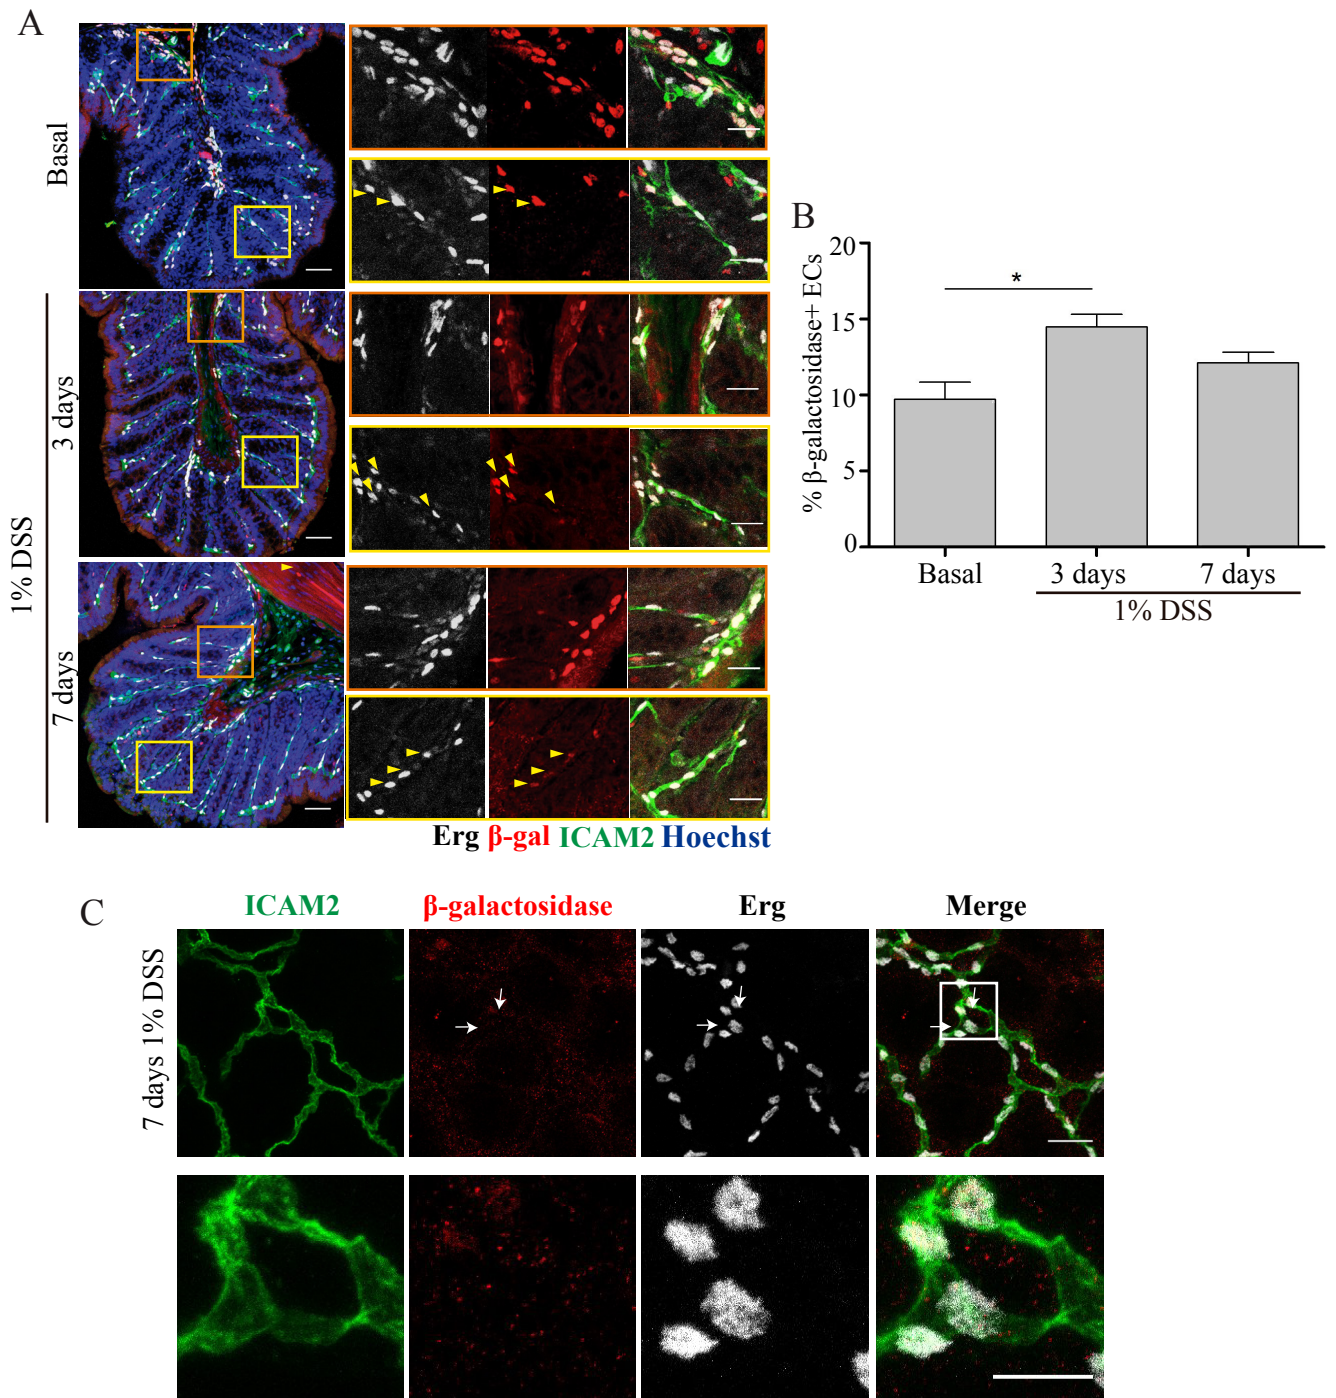

**Appendix Figure S1. MT1-MMP is expressed in endothelial cells of the mucosal plexus in the inflamed colon.** (A) Representative maximum intensity projection images of colon sections stained for ICAM2 (green),  $\beta$ -galactosidase (red), Erg (gray), and Hoechst (blue, nuclei) from  $MT1^{lacZ/+}$  reporter mice left untreated (basal) or treated for 3 or 7 days with 1% DSS. Magnified regions including mucosal arterioles (orange box) or capillaries (yellow box) are shown to the right. Arrowheads indicate  $\beta$ -gal-positive ECs in the capillaries. Scale bar, 50  $\mu$ m (left panels) and 25  $\mu$ m (magnified views). (B) Bar graph shows the percentage of endothelial cells (Erg) positive for  $\beta$ -galactosidase;  $n=3-5$  mice per condition. Data are shown as mean  $\pm$  SEM and were tested by Student t-test;  $*p<0.05$ . (C) Representative maximum intensity projection images of staining for ICAM2 (green),  $\beta$ -galactosidase (red), and Erg (gray) in whole-mount distal colon mucosal plexus from  $MT1^{lacZ/+}$  reporter mice treated for 7 days with 1% DSS. Scale bar, 20  $\mu$ m. White arrows indicate patches of  $\beta$ -galactosidase-positive endothelial cells.

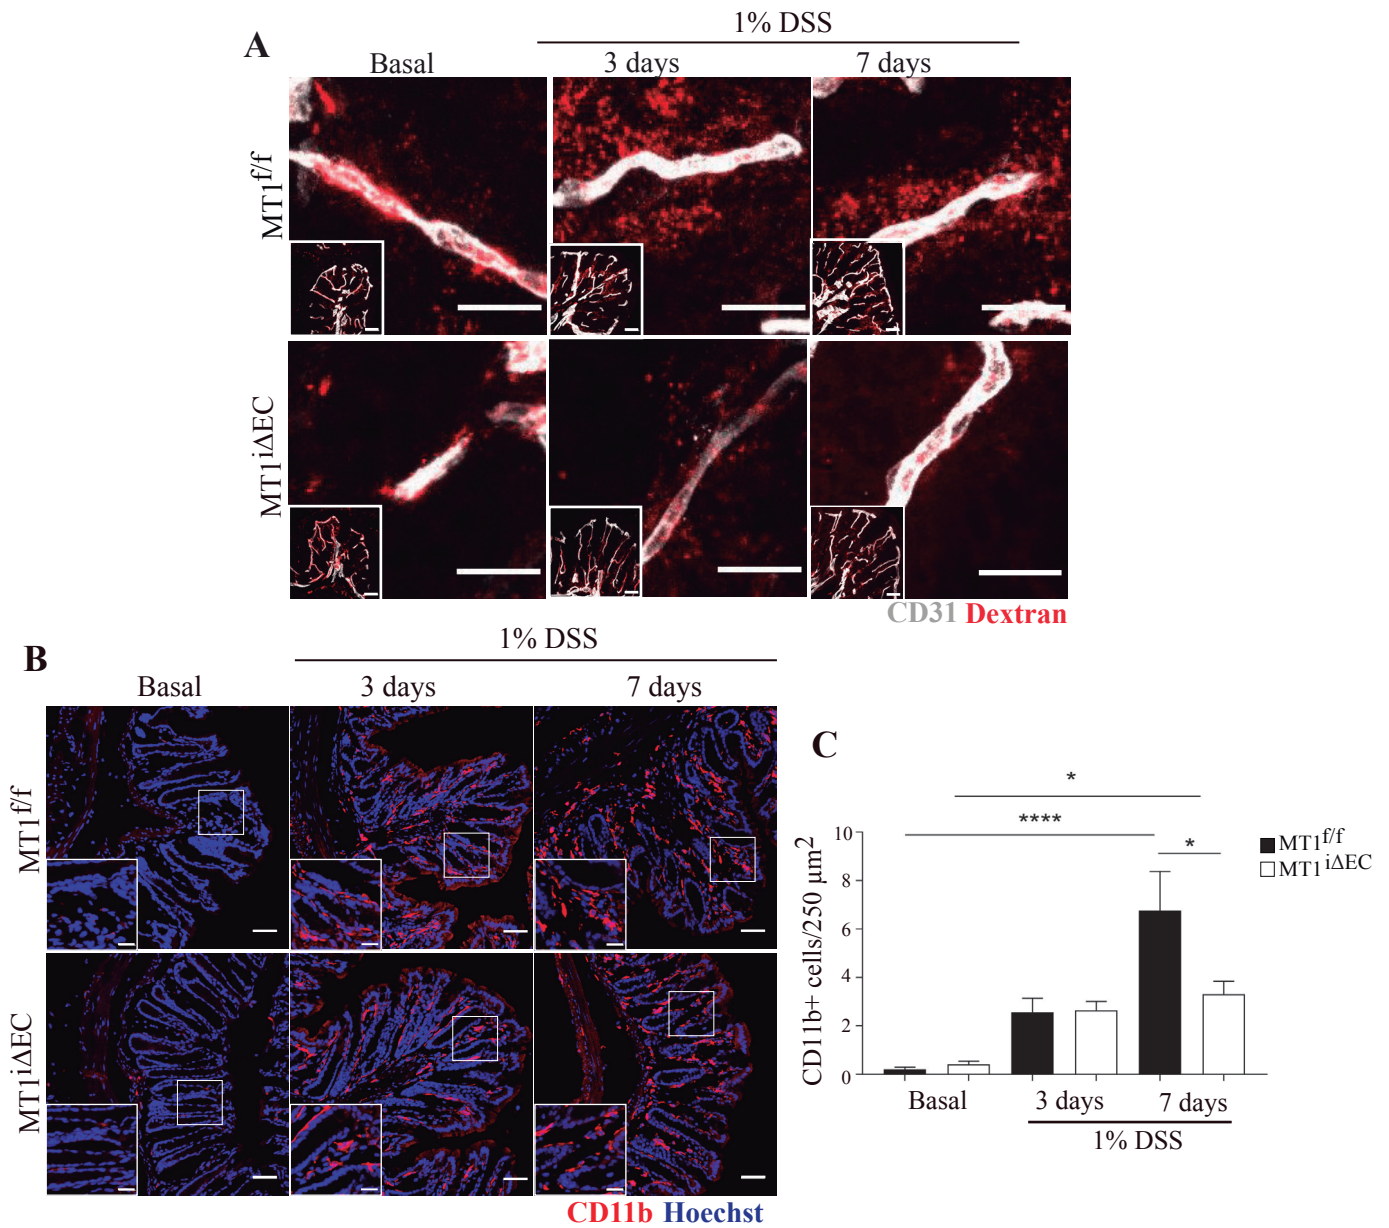

**Appendix Figure S2. MT1-MMP deletion in endothelial cells reduces vascular leakage but does not influence myeloid cell infiltrate during early colitis.** (A) Representative maximum intensity projection images of whole-mount distal colons stained for CD31 (gray) and 70 KD Dextran (red) in MT1<sup>f/f</sup> and MT1<sup>ΔEC</sup> mice left untreated (basal) or treated with 1% DSS for 3 or 7 days. Scale bar, 50 μm and 20 μm in the magnified views. (B) Representative maximum intensity projection images of staining for CD11b (red) and Hoechst (blue, nuclei) in colon sections from MT1<sup>f/f</sup> and MT1<sup>ΔEC</sup> mice left untreated (basal) or treated with 1% DSS for 3 or 7 days. Magnified views are shown in the insets. Scale bar, 50 μm and 25 μm in the magnified. (C) Quantification of CD11b+ cells in sections as in A; n=4-5 mice per genotype and time point. Data are shown as mean ± SEM and were tested by one-way ANOVA with Benjamini and Hochbers post-test; \*p<0.05, \*\*\*\*p<0.0001.

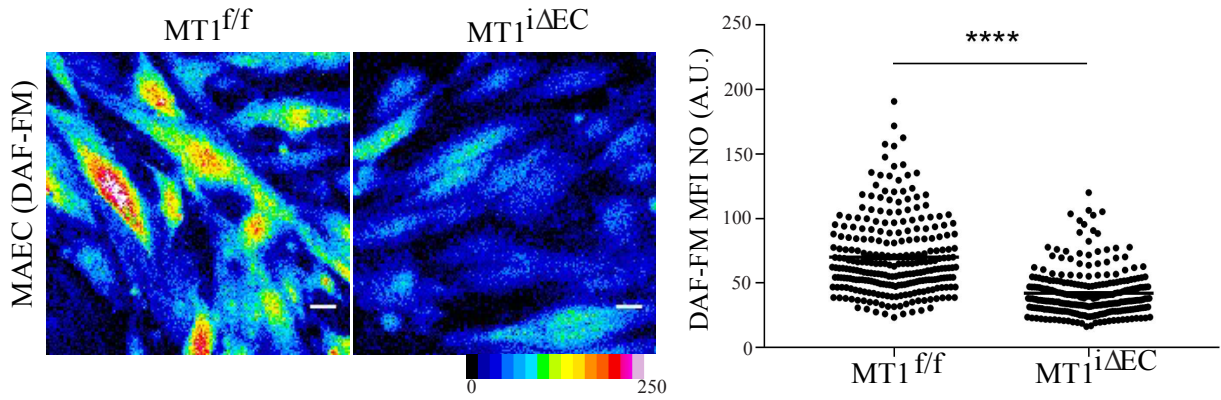

**Appendix Figure S3. Mouse aortic endothelial cells from  $MT1^{\Delta EC}$  mice produce lower amounts of nitric oxide.** Representative images are shown of mouse aortic endothelial cells from  $MT1^{f/f}$  and  $MT1^{\Delta EC}$  mice loaded with the DAF-FM nitric oxide probe (pseudocolor representation of green channel intensity); scale bar, 25  $\mu m$ . The graph shows DAF-FM mean fluorescence intensity (MFI) in  $n= 263-266$  cells analyzed per genotype in 3 independent experiments. Data are shown as individual cell values and the means and were analyzed by Mann-Whitney test; \*\*\*\* $p<0.0001$

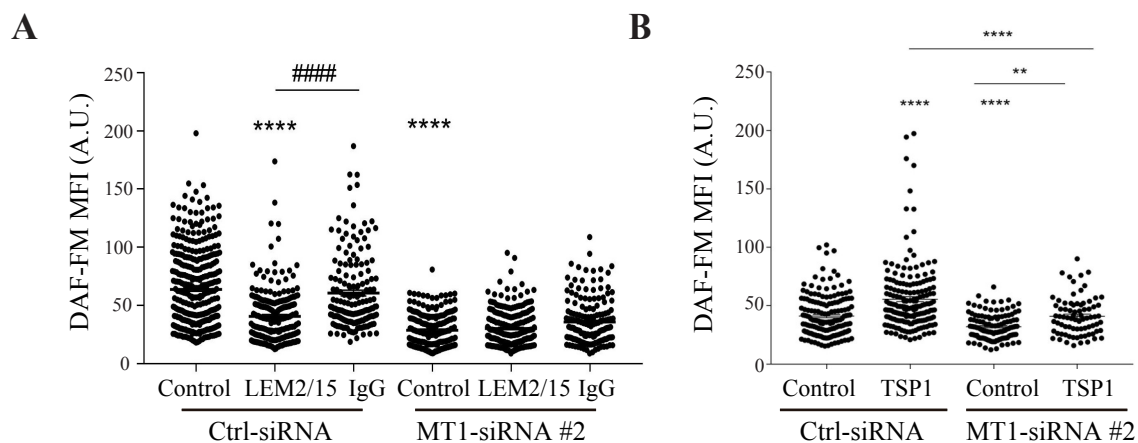

**Appendix Figure S4. Effects of MT1-MMP inhibition and of TSP1 on nitric oxide production by human endothelial cells.** (A) DAF-FM mean fluorescence intensity (MFI) in HUVEC expressing control or MT1-MMP siRNA and left untreated (Control) or treated with the inhibitory anti-MT1-MMP antibody LEM-2/15 (10  $\mu$ g/ml for 24 h) or its corresponding IgG1 isotype control (IgG); n=128-360 cells analyzed per condition in 3 independent experiments. (B) DAF-FM mean fluorescence intensity (MFI) values in HUVEC expressing control or MT1-MMP siRNA cultured on plates coated with 1% gelatin or with 1% gelatin plus 200 ng/ml TSP1; n= 78-184 cells in 3 independent experiments. Single cell values and the means are shown. Data were tested by Mann-Whitney test \*\*p<0.01 ##### or \*\*\*\*p<0.0001. \* mark comparison with Ctrl-siRNA; # mark comparison with isotype IgG.

| P1 position | Residues    | PWM ^ Score | Sec Struct pred | Disorder       | Transmemb domain | N-mass    | C-mass    |
|-------------|-------------|-------------|-----------------|----------------|------------------|-----------|-----------|
| 6           | GLAWG-LGVLF | 3.71        | ___HHHEEE       | .....          | OOOOOO<br>OOOO   | 633.28    | 128683.54 |
| 11          | LGVLF-LMHVC | 5.27        | HHEEEEEEE_      | .....          | OOOOOO<br>OOOO   | 1162.60   | 128154.22 |
| 93          | LLAS-LRQMK  | 6.64        | HHHHHHHHHH      | .....          | OOOOOO<br>OOOO   | 9933.05   | 119383.77 |
| 193         | RDLAS-IARLR | 1.17        | HHHHHHHHHH      | .....          | OOOOOO<br>OOOO   | 21025.78  | 108291.04 |
| 225         | TPPED-ILRNK | 3.00        | ___EE_          | .....          | OOOOOO<br>OOOO   | 24538.63  | 104778.19 |
| 253         | GSSPA-IRTNY | 0.54        | ___EEEE_        | .....          | OOOOOO<br>OOOO   | 27366.04  | 101950.78 |
| 286         | LELRG-LRTIV | 7.90        | HHHH_EEE        | .....          | OOOOOO<br>OOOO   | 31010.84  | 98305.98  |
| 440         | GGWSH-WSPWS | 1.33        | _____           | .....          | OOOOOO<br>OOOO   | 48377.51  | 80939.31  |
| 467         | NSPSP-QMNGK | 1.11        | _____           | *****<br>***** | OOOOOO<br>OOOO   | 51266.82  | 78050.00  |
| 578         | ACPPG-YSGNG | 0.89        | _____           | .....          | OOOOOO<br>OOOO   | 62958.91  | 66357.91  |
| 668         | NYLGH-YSDPM | 1.56        | _____           | .....          | OOOOOO<br>OOOO   | 72791.09  | 56525.73  |
| 1024        | DDYAG-FVFGY | 0.75        | ___EEEEEE       | .....          | OOOOOO<br>OOOO   | 112343.48 | 16973.34  |
| 1060        | QGYSG-LSVKV | 4.42        | ___EEEEEE       | .....          | OOOOOO<br>OOOO   | 116595.46 | 12721.36  |
| 1075        | GPGEH-LRNAL | 1.85        | ___EEEEEE       | .....          | OOOOOO<br>OOOO   | 118101.23 | 11215.59  |
| 1092        | GQVRT-LWHDP | 1.76        | _EEEEEE_        | .....          | OOOOOO<br>OOOO   | 120003.22 | 9313.60   |
| 1099        | HDPRH-IGWKD | 5.66        | _____H          | .....          | OOOOOO<br>OOOO   | 120944.68 | 8372.14   |

**Appendix Table S1. List of potential cleavage sites for MT1-MMP (MMP14) in thrombospondin-1 (TSP1).** Predicted sites for human MT1-MMP-mediated cleavage in TSP1 are shown with their cleavage scores (<http://cleavpredict.sanfordburnham.org/>). Candidate sites were filtered by *in silico* modeling and scored according to the peptide cleavage matrix in the MEROPS database (<http://merops.sanger.ac.uk/>). The selected cleavage sites in TSP1 are highlighted in yellow.

| Gene          | Direction | Primer Sequence                 |
|---------------|-----------|---------------------------------|
| <i>mMmp14</i> | Forward   | 5'- CAGTATGGCTACCTACCTCCAG-3    |
|               | Reverse   | 5'- GCCTTGCCTGTCACTTGTA AAA -3' |
| <i>mCdh5</i>  | Forward   | 5'-AAAGA AACTGGACAGAGAAA-3'     |
|               | Reverse   | 5'- GGTGTGCATTCTCATCCAAG -3     |
| <i>mTbp</i>   | Forward   | 5'- GCTCTGGAATTGTACCGCAG-3'     |
|               | Reverse   | 5'- CTGGCTCATAGCTCTTGGCTC-3'    |
| <i>mGapdh</i> | Forward   | 5'- AATGCATCCTGCACCACCAA-3'     |
|               | Reverse   | 5'- GTGGCAGTGATGGCATGGAC-3'     |
| <i>hNOS3</i>  | Forward   | 5'-GGCTGGGTTTAGGGCTGTG-3'       |
|               | Reverse   | 5'-TGAGGGGTGTCGTAGGTGATG-3'     |
| <i>hMMP14</i> | Forward   | 5'-GGCTACAGCAATATGGCTACC-3'     |
|               | Reverse   | 5'-GATGGCCGCTGAGAGTGAC-3'       |
| <i>hGAPDH</i> | Forward   | 5'-GGAGCGAGATCCCTCCAAAAT-3'     |
|               | Reverse   | 5'-GGCTGTTGTCATACTTCTCATGG-3'   |
| <i>hHPRT</i>  | Forward   | 5'-CCTGGCGTCGTGATTAGTGAT-3'     |
|               | Reverse   | 5'-AGACGTT CAGTCCTGTCCATAA-3'   |
| <i>hYWHAB</i> | Forward   | 5'-CCTGCATGAAGTCTGTAACTGAG-3'   |
|               | Reverse   | 5'-GACCTACGGGCTCCTACAACA-3'     |

**Appendix Table S2. List of qPCR primers used for mouse (m) and human (h) genes in this study.**

|           | Comparison                        | p-value    |
|-----------|-----------------------------------|------------|
| Figure 1B | CN MT1f/f vs. CN MT1EC            | 0,861      |
|           | CN MT1f/f vs. 3d 1DSS MT1f/f      | 0,0057     |
|           | CN MT1f/f vs. 3d 1DSS MT1EC       | 0,6013     |
|           | CN MT1f/f vs. 7d 1DSS MT1f/f      | 0,066      |
|           | CN MT1f/f vs. 7d 1DSS MT1EC       | 0,9492     |
|           | CN MT1EC vs. 3d 1DSS MT1f/f       | 0,0028     |
|           | CN MT1EC vs. 3d 1DSS MT1EC        | 0,4774     |
|           | CN MT1EC vs. 7d 1DSS MT1f/f       | 0,038      |
|           | CN MT1EC vs. 7d 1DSS MT1EC        | 0,7927     |
|           | 3d 1DSS MT1f/f vs. 3d 1DSS MT1EC  | 0,0225     |
|           | 3d 1DSS MT1f/f vs. 7d 1DSS MT1f/f | 0,2181     |
|           | 3d 1DSS MT1f/f vs. 7d 1DSS MT1EC  | 0,0026     |
|           | 3d 1DSS MT1EC vs. 7d 1DSS MT1f/f  | 0,198      |
|           | 3d 1DSS MT1EC vs. 7d 1DSS MT1EC   | 0,6026     |
|           | 7d 1DSS MT1f/f vs. 7d 1DSS MT1EC  | 0,0426     |
|           | Comparison                        | p-value    |
| Figure 1C | MT1f/f CN vs. MT1ΔEC CN           | 0,7134     |
|           | MT1f/f CN vs. MT1f/f DSS          | 0,0013     |
|           | MT1f/f CN vs. MT1ΔEC DSS          | 0,4721     |
|           | MT1ΔEC CN vs. MT1f/f DSS          | 0,0005     |
|           | MT1ΔEC CN vs. MT1ΔEC DSS          | 0,2821     |
|           | MT1f/f DSS vs. MT1ΔEC DSS         | 0,007      |
|           |                                   | Comparison |
| Figure 2B | cre- 3dias vs. cre + 3 dias       | 0,0937     |
|           | cre- 3dias vs. cre-7dias          | >0,9999    |
|           | cre- 3dias vs. cre+7 dias         | >0,9999    |
|           | cre + 3 dias vs. cre-7dias        | 0,3824     |
|           | cre + 3 dias vs. cre+7 dias       | 0,3775     |
|           | cre-7dias vs. cre+7 dias          | 0,0032     |
|           |                                   | Comparison |
| Figure 2E | 1                                 |            |
|           | CONTROL CRE- vs. CONTROL CRE+     | 0,8605     |
|           | CONTROL CRE- vs. 1% DSS CRE-      | 0,9948     |
|           | CONTROL CRE- vs. 1% DSS CRE+      | 0,6912     |
|           | CONTROL CRE+ vs. 1% DSS CRE-      | 0,8501     |
|           | CONTROL CRE+ vs. 1% DSS CRE+      | 0,5559     |
|           | 1% DSS CRE- vs. 1% DSS CRE+       | 0,6845     |
|           |                                   |            |
|           | 2                                 |            |
|           | CONTROL CRE- vs. CONTROL CRE+     | 0,8111     |
|           | CONTROL CRE- vs. 1% DSS CRE-      | 0,9635     |
|           | CONTROL CRE- vs. 1% DSS CRE+      | 0,6467     |
|           | CONTROL CRE+ vs. 1% DSS CRE-      | 0,8403     |
|           | CONTROL CRE+ vs. 1% DSS CRE+      | 0,8322     |
|           | 1% DSS CRE- vs. 1% DSS CRE+       | 0,6685     |
|           |                                   |            |
|           | 3                                 |            |
|           | CONTROL CRE- vs. CONTROL CRE+     | 0,6478     |



|           |                               |         |
|-----------|-------------------------------|---------|
|           | CONTROL CRE- vs. 1% DSS CRE-  | 0,8754  |
|           | CONTROL CRE- vs. 1% DSS CRE+  | 0,8069  |
|           | CONTROL CRE+ vs. 1% DSS CRE-  | 0,7529  |
|           | CONTROL CRE+ vs. 1% DSS CRE+  | 0,8138  |
|           | 1% DSS CRE- vs. 1% DSS CRE+   | 0,9299  |
|           |                               |         |
|           | 4                             |         |
|           | CONTROL CRE- vs. CONTROL CRE+ | 0,9049  |
|           | CONTROL CRE- vs. 1% DSS CRE-  | 0,4698  |
|           | CONTROL CRE- vs. 1% DSS CRE+  | 0,7689  |
|           | CONTROL CRE+ vs. 1% DSS CRE-  | 0,3917  |
|           | CONTROL CRE+ vs. 1% DSS CRE+  | 0,6713  |
|           | 1% DSS CRE- vs. 1% DSS CRE+   | 0,6445  |
|           |                               |         |
|           | 5                             |         |
|           | CONTROL CRE- vs. CONTROL CRE+ | 0,7488  |
|           | CONTROL CRE- vs. 1% DSS CRE-  | 0,0069  |
|           | CONTROL CRE- vs. 1% DSS CRE+  | 0,1306  |
|           | CONTROL CRE+ vs. 1% DSS CRE-  | 0,0022  |
|           | CONTROL CRE+ vs. 1% DSS CRE+  | 0,0614  |
|           | 1% DSS CRE- vs. 1% DSS CRE+   | 0,1934  |
|           |                               |         |
|           | 6                             |         |
|           | CONTROL CRE- vs. CONTROL CRE+ | 0,9829  |
|           | CONTROL CRE- vs. 1% DSS CRE-  | <0,0001 |
|           | CONTROL CRE- vs. 1% DSS CRE+  | <0,0001 |
|           | CONTROL CRE+ vs. 1% DSS CRE-  | <0,0001 |
|           | CONTROL CRE+ vs. 1% DSS CRE+  | <0,0001 |
|           | 1% DSS CRE- vs. 1% DSS CRE+   | <0,0001 |
|           |                               |         |
|           | 7                             |         |
|           | CONTROL CRE- vs. CONTROL CRE+ | 0,972   |
|           | CONTROL CRE- vs. 1% DSS CRE-  | <0,0001 |
|           | CONTROL CRE- vs. 1% DSS CRE+  | <0,0001 |
|           | CONTROL CRE+ vs. 1% DSS CRE-  | <0,0001 |
|           | CONTROL CRE+ vs. 1% DSS CRE+  | <0,0001 |
|           | 1% DSS CRE- vs. 1% DSS CRE+   | <0,0001 |
|           | Comparison                    | p-value |
| Figure 3C | CRE- vs. CRE+                 | 0,1624  |
|           | Comparison                    | p-value |
| Figure 3D | CRE- vs. CRE+                 | 0,00124 |

|           |                               |         |
|-----------|-------------------------------|---------|
|           | Comparison                    | p-value |
| Figure 3F | Cre- vs. Cre - ACH            | 0,0053  |
|           | Cre- vs. Cre - ACH no         | 0,0026  |
|           | Cre + vs. Cre + ACH           | 0,5619  |
|           | Cre + vs. Cre + ACH no        | <0,0001 |
|           | Cre - ACH vs. Cre + ACH       | 0,02    |
|           | Cre - ACH no vs. Cre + ACH no | 0,1083  |

|           |                                |          |
|-----------|--------------------------------|----------|
|           | Cre- vs. Cre +                 | 0,7287   |
|           | Cre - ACH vs. Cre - ACH no     | 0,5299   |
|           | Cre + ACH vs. Cre + ACH no     | 0,0001   |
|           | Comparison                     | p-value  |
| Figure 4A | control vs. siRNA 77           | < 0,0001 |
|           | Comparison                     | p-value  |
| Figure 4C | control vs. siRNA 77 (eNOS)    | 0,0001   |
|           | control vs. siRNA 79 (eNOS)    | 0,0001   |
|           | control vs. siRNA 77 (MT1-MMP) | 0,0001   |
|           | control vs. siRNA 79 (MT1-MMP) | 0,0001   |
|           | Comparison                     | p-value  |
| Figure 4D | c vs. 77 (eNOS)                | 0,00151  |
|           | c vs. 79 (eNOS)                | 0,0034   |
|           | c vs. 77 (MT1-MMP)             | 0,0003   |
|           | c vs. 79 (MT1-MMP)             | 0,0003   |
|           | Comparison                     | p-value  |
| Figure 5  | cre- vs. cre- dss              | 0,0001   |
|           | cre- vs. cre+                  | 0,622    |
|           | cre- vs. cre + dss             | 0,2252   |
|           | cre- vs. FL                    | <0,0001  |
|           | cre- vs. EA                    | 0,0246   |
|           | cre- vs. YF                    | 0,0002   |
|           | cre- dss vs. cre+              | 0,0018   |
|           | cre- dss vs. cre + dss         | 0,011    |
|           | cre- dss vs. FL                | 0,9979   |
|           | cre- dss vs. EA                | 0,0534   |
|           | cre- dss vs. YF                | 0,7293   |
|           | cre+ vs. cre + dss             | 0,5112   |
|           | cre+ vs. FL                    | 0,0013   |
|           | cre+ vs. EA                    | 0,1212   |
|           | cre+ vs. YF                    | 0,0032   |
|           | cre + dss vs. FL               | 0,0087   |
|           | cre + dss vs. EA               | 0,3904   |
|           | cre + dss vs. YF               | 0,0199   |
|           | FL vs. EA                      | 0,0445   |
|           | FL vs. YF                      | 0,7166   |
|           | EA vs. YF                      | 0,095    |
|           | Comparison                     | p-value  |
| Figure 6C | CRE- vs. CRE+                  | 0,0254   |
|           | Comparison                     | p-value  |
| Figure 7B | gel wt vs. av wt               | <0,0001  |
|           | gel wt vs. cd47 wt             | <0,0001  |
|           | gel wt vs. igg1 wt             | >0,9999  |
|           | gel wt vs. IGG1 10 wt          | >0,9999  |
|           | gel wt vs. gel sirna           | <0,0001  |
|           | gel wt vs. av sirna            | <0,0001  |
|           | gel wt vs. cd47 sirna          | <0,0001  |
|           | gel wt vs. igg1 sirna          | <0,0001  |
|           | gel wt vs. IGG1 10 sirna       | <0,0001  |
|           | av wt vs. cd47 wt              | 0,4821   |

|                                      |         |
|--------------------------------------|---------|
| av wt vs. igg1 wt                    | <0,0001 |
| av wt vs. IGG1 10 wt                 | <0,0001 |
| av wt vs. gel sirna                  | 0,0588  |
| av wt vs. av sirna                   | >0,9999 |
| av wt vs. cd47 sirna                 | 0,4926  |
| av wt vs. igg1 sirna                 | >0,9999 |
| av wt vs. IGG1 10 sirna              | >0,9999 |
| cd47 wt vs. igg1 wt                  | <0,0001 |
| cd47 wt vs. IGG1 10 wt               | <0,0001 |
| cd47 wt vs. gel sirna                | <0,0001 |
| cd47 wt vs. av sirna                 | 0,7843  |
| cd47 wt vs. cd47 sirna               | <0,0001 |
| cd47 wt vs. igg1 sirna               | >0,9999 |
| cd47 wt vs. IGG1 10 sirna            | >0,9999 |
| igg1 wt vs. IGG1 10 wt               | >0,9999 |
| igg1 wt vs. gel sirna                | <0,0001 |
| igg1 wt vs. av sirna                 | <0,0001 |
| igg1 wt vs. cd47 sirna               | <0,0001 |
| igg1 wt vs. igg1 sirna               | <0,0001 |
| igg1 wt vs. IGG1 10 sirna            | <0,0001 |
| IGG1 10 wt vs. gel sirna             | <0,0001 |
| IGG1 10 wt vs. av sirna              | <0,0001 |
| IGG1 10 wt vs. cd47 sirna            | <0,0001 |
| IGG1 10 wt vs. igg1 sirna            | <0,0001 |
| IGG1 10 wt vs. IGG1 10 sirna         | <0,0001 |
| gel sirna vs. av sirna               | 0,1306  |
| gel sirna vs. cd47 sirna             | >0,9999 |
| gel sirna vs. igg1 sirna             | 0,1316  |
| gel sirna vs. IGG1 10 sirna          | 0,0886  |
| av sirna vs. cd47 sirna              | 0,7833  |
| av sirna vs. igg1 sirna              | >0,9999 |
| av sirna vs. IGG1 10 sirna           | >0,9999 |
| cd47 sirna vs. igg1 sirna            | 0,72    |
| cd47 sirna vs. IGG1 10 sirna         | 0,5692  |
| igg1 sirna vs. IGG1 10 sirna         | >0,9999 |
| Comparison                           | p-value |
| Figure 7C GELATINA WT vs. RGD 200 WT | <0,0001 |
| GELATINA WT vs. RGD 20WT             | <0,0001 |
| GELATINA WT vs. RGD 2nM WT           | <0,0001 |
| GELATINA WT vs. RDAS 200 wt          | >0,9999 |
| GELATINA WT vs. RDAS20 wt            | >0,9999 |
| GELATINA WT vs. RDAS 2n wt           | >0,9999 |
| GELATINA WT vs. GELATINA sirna       | <0,0001 |
| GELATINA WT vs. RGD 200 sirna        | <0,0001 |
| GELATINA WT vs. RGD 20 sirna         | <0,0001 |
| GELATINA WT vs. RGD 2nM sirna        | <0,0001 |
| GELATINA WT vs. RDAS 200 sirna       | <0,0001 |
| GELATINA WT vs. RDAS20 sirna         | <0,0001 |
| GELATINA WT vs. RDAS 2 sirna         | <0,0001 |
| RGD 200 WT vs. RGD 20WT              | >0,9999 |

|                                |         |
|--------------------------------|---------|
| RGD 200 WT vs. RGD 2nM WT      | >0,9999 |
| RGD 200 WT vs. RDAS 200 wt     | 0,0001  |
| RGD 200 WT vs. RDAS20 wt       | <0,0001 |
| RGD 200 WT vs. RDAS 2n wt      | <0,0001 |
| RGD 200 WT vs. GELATINA sirna  | <0,0001 |
| RGD 200 WT vs. RGD 200 sirna   | 0,0417  |
| RGD 200 WT vs. RGD 20 sirna    | 0,0015  |
| RGD 200 WT vs. RGD 2nM sirna   | <0,0001 |
| RGD 200 WT vs. RDAS 200 sirna  | 0,0622  |
| RGD 200 WT vs. RDAS20 sirna    | <0,0001 |
| RGD 200 WT vs. RDAS 2 sirna    | 0,037   |
| RGD 20WT vs. RGD 2nM WT        | >0,9999 |
| RGD 20WT vs. RDAS 200 wt       | <0,0001 |
| RGD 20WT vs. RDAS20 wt         | <0,0001 |
| RGD 20WT vs. RDAS 2n wt        | <0,0001 |
| RGD 20WT vs. GELATINA sirna    | <0,0001 |
| RGD 20WT vs. RGD 200 sirna     | 0,5329  |
| RGD 20WT vs. RGD 20 sirna      | 0,0318  |
| RGD 20WT vs. RGD 2nM sirna     | 0,0001  |
| RGD 20WT vs. RDAS 200 sirna    | 0,7301  |
| RGD 20WT vs. RDAS20 sirna      | 0,0006  |
| RGD 20WT vs. RDAS 2 sirna      | 0,5109  |
| RGD 2nM WT vs. RDAS 200 wt     | <0,0001 |
| RGD 2nM WT vs. RDAS20 wt       | <0,0001 |
| RGD 2nM WT vs. RDAS 2n wt      | <0,0001 |
| RGD 2nM WT vs. GELATINA sirna  | <0,0001 |
| RGD 2nM WT vs. RGD 200 sirna   | 0,0944  |
| RGD 2nM WT vs. RGD 20 sirna    | 0,004   |
| RGD 2nM WT vs. RGD 2nM sirna   | <0,0001 |
| RGD 2nM WT vs. RDAS 200 sirna  | 0,1373  |
| RGD 2nM WT vs. RDAS20 sirna    | <0,0001 |
| RGD 2nM WT vs. RDAS 2 sirna    | 0,086   |
| RDAS 200 wt vs. RDAS20 wt      | >0,9999 |
| RDAS 200 wt vs. RDAS 2n wt     | 0,3394  |
| RDAS 200 wt vs. GELATINA sirna | <0,0001 |
| RDAS 200 wt vs. RGD 200 sirna  | <0,0001 |
| RDAS 200 wt vs. RGD 20 sirna   | <0,0001 |
| RDAS 200 wt vs. RGD 2nM sirna  | <0,0001 |
| RDAS 200 wt vs. RDAS 200 sirna | <0,0001 |
| RDAS 200 wt vs. RDAS20 sirna   | <0,0001 |
| RDAS 200 wt vs. RDAS 2 sirna   | <0,0001 |
| RDAS20 wt vs. RDAS 2n wt       | >0,9999 |
| RDAS20 wt vs. GELATINA sirna   | <0,0001 |
| RDAS20 wt vs. RGD 200 sirna    | <0,0001 |
| RDAS20 wt vs. RGD 20 sirna     | <0,0001 |
| RDAS20 wt vs. RGD 2nM sirna    | <0,0001 |
| RDAS20 wt vs. RDAS 200 sirna   | <0,0001 |
| RDAS20 wt vs. RDAS20 sirna     | <0,0001 |
| RDAS20 wt vs. RDAS 2 sirna     | <0,0001 |
| RDAS 2n wt vs. GELATINA sirna  | <0,0001 |

|                                   |         |
|-----------------------------------|---------|
| RDAS 2n wt vs. RGD 200 sirna      | <0,0001 |
| RDAS 2n wt vs. RGD 20 sirna       | <0,0001 |
| RDAS 2n wt vs. RGD 2nM sirna      | <0,0001 |
| RDAS 2n wt vs. RDAS 200 sirna     | <0,0001 |
| RDAS 2n wt vs. RDAS20 sirna       | <0,0001 |
| RDAS 2n wt vs. RDAS 2 sirna       | <0,0001 |
| GELATINA sirna vs. RGD 200 sirna  | 0,3107  |
| GELATINA sirna vs. RGD 20 sirna   | >0,9999 |
| GELATINA sirna vs. RGD 2nM sirna  | >0,9999 |
| GELATINA sirna vs. RDAS 200 sirna | 0,2163  |
| GELATINA sirna vs. RDAS20 sirna   | >0,9999 |
| GELATINA sirna vs. RDAS 2 sirna   | 0,233   |
| RGD 200 sirna vs. RGD 20 sirna    | >0,9999 |
| RGD 200 sirna vs. RGD 2nM sirna   | >0,9999 |
| RGD 200 sirna vs. RDAS 200 sirna  | >0,9999 |
| RGD 200 sirna vs. RDAS20 sirna    | >0,9999 |
| RGD 200 sirna vs. RDAS 2 sirna    | >0,9999 |
| RGD 20 sirna vs. RGD 2nM sirna    | >0,9999 |
| RGD 20 sirna vs. RDAS 200 sirna   | >0,9999 |
| RGD 20 sirna vs. RDAS20 sirna     | >0,9999 |
| RGD 20 sirna vs. RDAS 2 sirna     | >0,9999 |
| RGD 2nM sirna vs. RDAS 200 sirna  | >0,9999 |
| RGD 2nM sirna vs. RDAS20 sirna    | >0,9999 |
| RGD 2nM sirna vs. RDAS 2 sirna    | >0,9999 |
| RDAS 200 sirna vs. RDAS20 sirna   | >0,9999 |
| RDAS 200 sirna vs. RDAS 2 sirna   | >0,9999 |
| RDAS20 sirna vs. RDAS 2 sirna     | >0,9999 |
| Comparison                        | p-value |
| Figure 7D gel wt vs. cilen 200 wt | <0,0001 |
| gel wt vs. cilen 1 wt             | <0,0001 |
| gel wt vs. gel sirna              | <0,0001 |
| gel wt vs. cilen 200 sirna        | <0,0001 |
| gel wt vs. cilen 1 sirna          | <0,0001 |
| cilen 200 wt vs. cilen 1 wt       | >0,9999 |
| cilen 200 wt vs. gel sirna        | 0,0157  |
| cilen 200 wt vs. cilen 200 sirna  | <0,0001 |
| cilen 200 wt vs. cilen 1 sirna    | <0,0001 |
| cilen 1 wt vs. gel sirna          | <0,0001 |
| cilen 1 wt vs. cilen 200 sirna    | <0,0001 |
| cilen 1 wt vs. cilen 1 sirna      | <0,0001 |
| gel sirna vs. cilen 200 sirna     | >0,9999 |
| gel sirna vs. cilen 1 sirna       | 0,7646  |
| cilen 200 sirna vs. cilen 1 sirna | >0,9999 |
| Comparison                        | p-value |
| Figure 7E gel wt vs. nonamero 200 | <0,0001 |
| gel wt vs. nonamero 2             | <0,0001 |
| gel wt vs. Control 200            | 0,2515  |
| gel wt vs. control2               | >0,9999 |
| gel wt vs. gel sirna              | <0,0001 |
| gel wt vs. nonamero 200 sirna     | <0,0001 |

|                                          |                                     |         |
|------------------------------------------|-------------------------------------|---------|
| gel wt vs. nonamero 2 sirna              | <0,0001                             |         |
| gel wt vs. Control 200 sirna             | <0,0001                             |         |
| gel wt vs. control2 sirna                | <0,0001                             |         |
| nonamero 200 vs. nonamero 2              | >0,9999                             |         |
| nonamero 200 vs. Control 200             | <0,0001                             |         |
| nonamero 200 vs. control2                | <0,0001                             |         |
| nonamero 200 vs. gel sirna               | >0,9999                             |         |
| nonamero 200 vs. nonamero 200 sirna      | >0,9999                             |         |
| nonamero 200 vs. nonamero 2 sirna        | >0,9999                             |         |
| nonamero 200 vs. Control 200 sirna       | >0,9999                             |         |
| nonamero 200 vs. control2 sirna          | >0,9999                             |         |
| nonamero 2 vs. Control 200               | <0,0001                             |         |
| nonamero 2 vs. control2                  | <0,0001                             |         |
| nonamero 2 vs. gel sirna                 | >0,9999                             |         |
| nonamero 2 vs. nonamero 200 sirna        | >0,9999                             |         |
| nonamero 2 vs. nonamero 2 sirna          | >0,9999                             |         |
| nonamero 2 vs. Control 200 sirna         | >0,9999                             |         |
| nonamero 2 vs. control2 sirna            | >0,9999                             |         |
| Control 200 vs. control2                 | >0,9999                             |         |
| Control 200 vs. gel sirna                | <0,0001                             |         |
| Control 200 vs. nonamero 200 sirna       | <0,0001                             |         |
| Control 200 vs. nonamero 2 sirna         | <0,0001                             |         |
| Control 200 vs. Control 200 sirna        | <0,0001                             |         |
| Control 200 vs. control2 sirna           | <0,0001                             |         |
| control2 vs. gel sirna                   | <0,0001                             |         |
| control2 vs. nonamero 200 sirna          | <0,0001                             |         |
| control2 vs. nonamero 2 sirna            | <0,0001                             |         |
| control2 vs. Control 200 sirna           | <0,0001                             |         |
| control2 vs. control2 sirna              | <0,0001                             |         |
| gel sirna vs. nonamero 200 sirna         | >0,9999                             |         |
| gel sirna vs. nonamero 2 sirna           | 0,1851                              |         |
| gel sirna vs. Control 200 sirna          | >0,9999                             |         |
| gel sirna vs. control2 sirna             | 0,0642                              |         |
| nonamero 200 sirna vs. nonamero 2 sirna  | >0,9999                             |         |
| nonamero 200 sirna vs. Control 200 sirna | >0,9999                             |         |
| nonamero 200 sirna vs. control2 sirna    | >0,9999                             |         |
| nonamero 2 sirna vs. Control 200 sirna   | >0,9999                             |         |
| nonamero 2 sirna vs. control2 sirna      | >0,9999                             |         |
| Control 200 sirna vs. control2 sirna     | >0,9999                             |         |
| Comparison                               | p-value                             |         |
| Figure 8B                                | CONTROL vs UC low activity          | 0,0003  |
|                                          | CONTROL vs UC high activity         | 0,9854  |
|                                          | UC low activity vs UC high activity | 0,0003  |
|                                          | CONTROL vs CD low activity          | 0,0546  |
|                                          | CONTROL vs CD high activity         | 0,9472  |
|                                          | CD low activity vs CD high activity | 0,0646  |
|                                          | Comparison                          | p-value |
| Figure 8D                                | IgG vs. LEM-2/15                    | 0,0071  |
|                                          | Comparison                          | p-value |
| Figure 8G                                | GDGRADACK vs. GDGRGDACK             | 0,0438  |

|       | Comparison                                       | p-value |
|-------|--------------------------------------------------|---------|
| EV3B  | MT1f/f - MT1f/fVeCdhCreERT2                      |         |
|       | 1                                                | >0,9999 |
|       | 2                                                | 0,9057  |
|       | 3                                                | >0,9999 |
|       | 4                                                | 0,8801  |
|       | 5                                                | 0,7547  |
|       | 6                                                | 0,2915  |
|       | 7                                                | 0,9657  |
|       | 8                                                | 0,1929  |
|       | 9                                                | 0,3272  |
|       | 10                                               | 0,0745  |
|       | 11                                               | 0,219   |
|       | 12                                               | <0,0001 |
|       | 13                                               | 0,0041  |
|       | 14                                               | 0,0008  |
| 15    | 0,0022                                           |         |
|       | Comparison                                       | p-value |
| EV 3C | MT1f/f - MT1f/fVeCdhCreERT2                      |         |
|       | 1                                                | >0,9999 |
|       | 2                                                | 0,7699  |
|       | 3                                                | 0,478   |
|       | 4                                                | 0,7678  |
|       | 5                                                | 0,7044  |
|       | 6                                                | 0,9618  |
|       | 7                                                | 0,8615  |
|       | 8                                                | 0,6491  |
|       | 9                                                | 0,5795  |
|       | 10                                               | 0,1348  |
|       | 11                                               | 0,0559  |
|       | 12                                               | 0,0021  |
|       | 13                                               | 0,0014  |
|       | 14                                               | 0,0017  |
| 15    | 0,004                                            |         |
|       | Comparison                                       | p-value |
| EV 4D | MT1f/f - MT1f/fVeCdhCreERT2                      | 0,0231  |
|       | Comparison                                       | p-value |
| EV 5E | MT1 siRNA_Control vs MT1 siRNA_TSP1 full 200     | 0,3981  |
|       | MT1 siRNA_Control vs MT1 siRNA_E123CaG 200       | 0,021   |
|       | MT1 siRNA_TSP1 full 200 vs MT1 siRNA_E123CaG 200 | 0,0003  |
|       | Comparison                                       | p-value |
| EV 5G | TSP1 full vs E123CaG 200                         | 0,0444  |

**Table S3.** List of exact p-values for graphs in Main Figures and Expanded View Figures.
